# Supplementary material
Source: ML conference proceedings conference paper supplement (https://aclanthology.org/2022.gebnlp-1.23)
Supplement: dataset [file Annotation Guide HeteroCorpus.pdf › HeteroCorpus-main/Annotation Guide HeteroCorpus.pdf]

## **Heteronormative Annotation Guide**

In this task we construct a corpus that indicates heteronormative content in publically available tweets. Heteronormativity can be defined as:

Heteronormativity refers to the social, political and economic regimen imparted by the patriarchy, extending itself through both the public and private domain. According to this regimen, the only acceptable and normal form to express sexual and affective desires, and even one's own identity is heterosexuality, which assumes that masculinity and femininity are substantially complementary with respect to desire. That is, sexual preferences as well as social roles and relationships that are established between individuals in society should be based in the 'masculine-feminine' binary, and always corresponds 'biological sex' with gender identity and the social responsibility assigned to it. (Asilo's Dictionary)

The annotation process will be done in Excel, where you can find the number of the tweet, the tweet, the ID, and a column where you must label the tweet. It is a binary classification, and we expect three types of tags:

- A. 0: The tweet has heteronormative content.
- B. 1: The tweet does not have heteronormative content.
- C. The tweet does not have valuable content; for example, the tweet is full of emojis, hashtags, mentions or is in another language.

For the clasificacion you must consider all the elements within the tweet, this includes the emojis, hashtags, the sentence structure, interjections, memes, images, trends, if it is a response and the textual content. If the tweet has a link, it is recommended to follow it to best determine the tag. Tweets that begin with the at sign are not indicating the author's username, instead it means that the tweet is responding to another user or is including a mention.

For this task it is not mandatory to dwell on linguistics issues, with the annotation of the heteronormativity it is enough. The communication between the annotators is prohibited.
